# Supplementary material for: Novel and Efficient Quantitative Posterior-Circulation-Structure-Based Scale via Noncontrast CT to Predict Ischemic Stroke Prognosis: A Retrospective Study
Source: MDPI journal article supplement (doi:10.3390/jpm12020138), 2022-01-20
Supplement: s1 [file s1]

**Table S1.** Gender stratification basic demographic distribution.

|                        | Male                            |                                |                     | Female                         |                                 |                     |
|------------------------|---------------------------------|--------------------------------|---------------------|--------------------------------|---------------------------------|---------------------|
|                        | Good prognosis<br>(visits = 13) | Poor prognosis<br>(visits = 7) | <i>p</i> -<br>value | Good prognosis<br>(visits = 5) | Poor prognosis<br>(visits = 11) | <i>p</i> -<br>value |
| Age (mean ± SD)        | 66.00 ± 12.50                   | 72.71 ± 12.32                  | 0.112               | 69.00 ± 9.00                   | 76.18 ± 8.76                    | 0.110               |
| BMI, kg/m <sup>2</sup> | 25.00 ± 5.55                    | 24.78 ± 1.10                   | 0.662               | 22.07 ± 2.53                   | 24.19 ± 3.26                    | 0.061               |
| Treatment              |                                 |                                | 1.000               |                                |                                 | 1.000               |
| Drugs                  | 11 (84.6%)                      | 6 (85.7%)                      |                     | 5 (100.0%)                     | 9 (81.8%)                       |                     |
| EVT + rt-PA            | 2 (15.4%)                       | 1 (14.3%)                      |                     | 0 (0.0%)                       | 2 (18.2%)                       |                     |
| SBP                    | 146.08 ± 33.94                  | 158.50 ± 18.87                 | 0.300               | 154.00 ± 32.83                 | 140.82 ± 32.46                  | 0.335               |
| DBP                    | 84.42 ± 20.19                   | 81.00 ± 10.12                  | 0.511               | 77.40 ± 15.27                  | 79.27 ± 16.94                   | 0.777               |
| HR                     | 86.42 ± 18.08                   | 91.57 ± 11.07                  | 0.419               | 85.20 ± 13.20                  | 96.27 ± 35.94                   | 0.910               |
| pc-ASPECTS             | 9.23 ± 0.83                     | 8.43 ± 1.40                    | 0.180               | 9.40 ± 0.55                    | 9.00 ± 0.89                     | 0.399               |

Good prognosis: mRS ≤ 2, poor prognosis: mRS ≥ 3

**Table S2.** Age stratification basic demographic distribution.

|                        | <b>≤70</b>                              |                                        |                     | <b>&gt;70</b>                          |                                         |                     |
|------------------------|-----------------------------------------|----------------------------------------|---------------------|----------------------------------------|-----------------------------------------|---------------------|
|                        | <b>Good prognosis<br/>(visits = 13)</b> | <b>Poor prognosis<br/>(visits = 7)</b> | <b>p-<br/>value</b> | <b>Good prognosis<br/>(visits = 5)</b> | <b>Poor prognosis<br/>(visits = 11)</b> | <b>p-<br/>value</b> |
| Gender (%)             |                                         |                                        | 0.383               |                                        |                                         | 0.266               |
| Male                   | 10 (71.4%)                              | 4 (44.4%)                              |                     | 3 (75.0%)                              | 3 (33.3%)                               |                     |
| Female                 | 4 (28.6%)                               | 5 (55.6%)                              |                     | 1 (25.0%)                              | 6 (66.7%)                               |                     |
| BMI, kg/m <sup>2</sup> | 24.94±5.25                              | 24.17 ± 1.72                           | 0.975               | 21.55 ± 3.25                           | 24.67±3.36                              | 0.105               |
| Treatment              |                                         |                                        | 1.000               |                                        |                                         | 1.000               |
| Drugs                  | 12 (85.7%)                              | 8 (88.9%)                              |                     | 4 (100.0%)                             | 7 (77.8%)                               |                     |
| EVT + rt-PA            | 2 (14.3%)                               | 1 (11.1%)                              |                     | 0 (0.0%)                               | 2 (22.2%)                               |                     |
| SBP                    | 152.54 ± 35.47                          | 160.25 ± 32.45                         | 0.716               | 135.00 ± 19.75                         | 135.33 ± 21.00                          | 1.000               |
| DBP                    | 84.46 ± 18.95                           | 82.25 ± 17.32                          | 0.856               | 75.50 ± 18.57                          | 77.78 ± 12.30                           | 0.587               |
| HR                     | 87.69 ± 18.28                           | 83.00 ± 11.78                          | 0.545               | 80.75 ± 6.85                           | 105.89 ± 35.85                          | 0.037*              |
| pc-<br>ASPECTS         | 9.21 ± 0.70                             | 8.56 ± 1.24                            | 0.169               | 9.50 ± 1.00                            | 9.00 ± 1.00                             | 0.386               |

Good prognosis: mRS ≤ 2, poor prognosis: mRS ≥ 3; \* p-value < 0.05.
